# Supplementary material for: The Effect of Pre-Veraison Smoke Exposure of Grapes on Phenolic Compounds and Smoky Flavour in Wine
Source: Hindawi journal article supplement (doi:10.1155/2022/9820204), 2022-11-30
Supplement: f1 [file 9820204.f1.docx]

**Table S1**. Basic chemical composition for grapes sampled at harvest.

| **Cultivar** | **Vineyard**† | **TSS (Bé)** | **pH** | **TA (g/L)** ‡ | **MA (g/L)** | **YAN (mg/L)** |
| --- | --- | --- | --- | --- | --- | --- |
| Chardonnay | A | 13.3 | 3.25 | 8.7 | 4.57 | 298 |
|  | B | 13.4 | 3.38 | 6.6 | 3.49 | 280 |
|  | C | 12.4 | 3.21 | 8.8 | 4.82 | 328 |
|  | D | 12.6 | 3.30 | 10.6 | 6.12 | 460 |
|  | E | 11.8 | 3.55 | 7.1 | 4.37 | 240 |
|  | G | 12.4 | 3.31 | 8.0 | 4.10 | 238 |
|  | J | 13.6 | 3.55 | 8.4 | 4.26 | 385 |
|  | K | 12.5 | 3.35 | 9 | 4.61 | 406 |
|  |  |  |  |  |  |  |
| Pinot Noir | A | 11.7 | 3.42 | 6.6 | 3.66 | 275 |
|  | B | 11.3 | 3.29 | 7.3 | 4.10 | 162 |
|  | C | 11.1 | 3.34 | 8.5 | 5.89 | 350 |
|  | D | 12.6 | 3.38 | 6.7 | 3.03 | 322 |
|  | E | 12.8 | 3.39 | 6.8 | 4.01 | 221 |
|  | G | 11.0 | 3.41 | 5.9 | 2.73 | 318 |
|  | L | 11.5 | 3.46 | 6.1 | 3.74 | 269 |
|  |  |  |  |  |  |  |
| Shiraz | A | 13.9 | 3.14 | 8.9 | 4.61 | 161 |
|  | B | 15.1 | 3.25 | 7.2 | 2.74 | 156 |
|  | C | 14.2 | 3.25 | 9.5 | 5.42 | 247 |
|  | D | 13.8 | 3.17 | 8.8 | 4.78 | 296 |
|  | F | 13.7 | 3.19 | 7.8 | 4.53 | 227 |
|  | G | 13.2 | 3.31 | 8.5 | 4.99 | 282 |
|  | I | 16.3 | 3.42 | 6.8 | 3.73 | 288 |
|  | K | 15.5 | 3.30 | 7.3 | 3.82 | 291 |

†For details of vineyard code, see Table 1. ‡TA at pH 8.2 (g/L). MA, malic acid; YAN, yeast assimilable nitrogen.

**Table S2.** Phenolic glycosides (ng/berry) in grapes sampled at pre-veraison and harvest.

|  |  |  | **Concentration (ng/berry)** | | | | | |
| --- | --- | --- | --- | --- | --- | --- | --- | --- |
| **Time point** | **Cultivar** | **Vineyard†** | **SyGG** | **MSyGG** | **PhRG** | **GuRG** | **CrRG** | **MGuRG** |
| Pre-veraison | Chardonnay | A | 0.90±0.1 | <LoQ | <LoQ | <LoQ | 0.61±0.1 | <LoQ |
|  | B‡ | 0.90±0 | <LoQ | <LoQ | <LoQ | 0.43±0 | <LoQ |
|  | C | 32±2.5* | 4.5±0.5* | 0.70±0.2 | 1.2±0.1* | 1.4±0 | 2.2±0.4* |
|  | D | 1.0±0.2 | <LoQ | <LoQ | <LoQ | 0.66±0 | <LoQ |
|  | E | 7.1±1.5 | 0.60±0.1 | 0.40±0.2 | 0.5±0.1 | 0.84±0.3 | 0.77±0.3 |
|  | G | 49±18* | 6.0±1.5* | 1.7±1.4* | 2.9±1.1* | 2.5±1.3* | 4.2±1.6* |
|  | J | 64±16* | 5.6±1.6* | 1.5±0.6* | 2.1±0.5* | 2.8±0.3* | 3.0±0.7* |
|  | K | 10±2.5 | 0.9±0.1 | 0.6±0.3 | 0.8±0.1 | 1.0±0.1 | 0.87±0.1 |
|  |  |  |  |  |  |  |  |
| Pinot Noir | A | 0.50±0.1 | <LoQ | <LoQ | 0.5±0 | 0.70±0 | <LoQ |
|  | B‡ | 0.40±0 | <LoQ | <LoQ | <LoQ | 0.40±0.1 | <LoQ |
|  | C | 12±3.9* | 1.0±0.4* | 1.2±0.7 | 2.0±0.8* | 1.6±0.5 | 1.4±0.7 |
|  | D | 0.71±0.1 | <LoQ | 0.41±0.2 | <LoQ | 0.60±0.1 | <LoQ |
|  | E | 6.6±1.8 | <LoQ | 0.83±0.5 | 0.96±0.2 | 1.4±0.3 | 0.71±0.3 |
|  | G | 37±7.2* | 2.6±0.3* | 5.0±1.9* | 8.3±1.6* | 7.2±0.8* | 6.2±0.9* |
|  | H | 37±8.8* | 2.2±0.4* | 6.2±3.8* | 6.4±0.9* | 8.5±1.3* | 4.9±1.8* |
|  | L | 24±4.2* | 2.2±0.5* | 4.2±2.5* | 5.4±0.9* | 5.5±0.5* | 3.4±1.2* |
|  |  |  |  |  |  |  |  |
| Shiraz | A‡ | 0.80±0.1 | <LoQ | <LoQ | <LoQ | <LoQ | <LoQ |
|  | B | 0.70±0 | <LoQ | <LoQ | <LoQ | <LoQ | <LoQ |
|  | C | 21±0.4 | 3.5±0.1 | 0.40±0 | 1.1±0.2 | 0.97±0.4 | 1.8±17 |
|  | D | 1.3±0 | <LoQ | <LoQ | <LoQ | <LoQ | <LoQ |
|  | F | 18±0.7 | 2.7±0.1 | <LoQ | 1.0±0.2 | 0.80±0.5 | 1.4±16 |
|  | G | 46±4.9* | 8.1±0.8* | 0.97±2.6* | 3.0±1.9* | 2.3±4.2* | 5.4±15* |
|  | I | 32±1.5* | 5.4±0.2* | 0.70±0.3 | 1.6±0.3 | 1.6±0.7 | 2.5±18 |
|  | K | 18±0.3 | 3.3±0.1 | 0.40±0.3 | 1.2±0.1 | 1.0±0.4 | 1.7±6.7 |
|  |  |  |  |  |  |  |  |  |
| Harvest | Chardonnay | A | 1.6±0 | <LoQ | 0.70±0 | 1.2±0.2 | 2.1±0.3 | 1.7±0.2 |
|  | B‡ | 1.9±0.2 | <LoQ | 0.80±0.1 | 1.3±0.3 | 1.8±0.1 | 2.3±0.8 |
|  | C | 67±6.1* | 12±0.7* | 4.3±0.5* | 6.5±0.2* | 7.7±0.6* | 16±2.2* |
|  | D | 2.0±0.2 | <LoQ | 1.3±0.1 | 0.9±0.1 | 2.3±0.1 | 2.6±0.6 |
|  | E | 20±0.8 | 3.3±0.4 | 2.6±0.3* | 1.1±0.1 | 4.5±0.5* | 7.3±0.8* |
|  | G | 130±33* | 24±8.5* | 6.8±1.3* | 13±2.2* | 11±2.1* | 30±3.2* |
|  | J | 98±12* | 15±2.4* | 4.8±0.4* | 8.9±0.5* | 11±1.0* | 24±1.0* |
|  | K | 31±6.7* | 4.4±1.1 | 4.6±0.8* | 5.1±1.2* | 5.9±1.4* | 9.8±2.8* |
|  |  |  |  |  |  |  |  |
| Pinot Noir | A | 2.8±0.4 | 1.6±0.8 | 2.0±1.2 | 3.8±1.5 | 3.5±0.7 | 3.0±1.1 |
|  | B‡ | 2.1±0.1 | <LoQ | 3.0±0.3 | 2.9±0.6 | 2.2±0.1 | 2.5±0.8 |
|  | C | 32±10* | 4.2±0.8* | 6.0±1.7* | 4.3±0.3 | 6.0±2.2 | 6.7±2.2 |
|  | D | 3.1±0.2 | 1.1±0.1 | 2.4±0.2 | 3.3±0.2 | 3.3±0.6 | 3.3±0.1 |
|  | E | 24±1.5* | 2.9±0.3 | 4.8±0.2 | 3.8±0.4 | 7.4±1 | 6.5±0.7 |
|  | G | 125±12* | 11±1.7* | 19±1.9* | 7.7±1.4* | 21±3.1* | 27±4.2* |
|  | H | 110±14* | 12±2.1* | 20±2* | 8.0±0.4* | 41±5.8* | 37±7.7* |
|  | L | 80±3.7* | 11±0.4* | 13±1.3* | 6.0±0.7* | 22±2.6* | 22±1.8* |
|  |  |  |  |  |  |  |  |
| Shiraz | A‡ | 3.8±0.4 | <LoQ | <LoQ | 3.5±0.3 | 3.0±0.7 | 5.0±1.1 |
|  | B | 3.0±0.5 | <LoQ | <LoQ | 3.3±0.5 | 3.1±0.2 | 4.4±1 |
|  | C | 37±4.5* | 6.1±1.2* | 2.5±0.5* | 14±4.0* | 7.0±1.4* | 31±6.3* |
|  | D | 5.2±1.8 | <LoQ | 1.5±0.4 | 5.2±0.7 | 4.8±1.4 | 7.1±1.8 |
|  | F | 37±6.7* | 6.5±1.2* | 2.4±0.4* | 12±2.1* | 8.8±1.5* | 29±5.7* |
|  | G | 74±7.2* | 13±1.9* | 2.0±0.2* | 13±3.0* | 5.6±1.1 | 35±6.2* |
|  | I | 41±6.5* | 7.3±1.5* | 4.4±1.0* | 20±4.0* | 14±2.9* | 39±12* |
|  | K | 39±5.7* | 6.5±1.2* | 4.9±0.7* | 19±0.9* | 12±0.9* | 42±1.6* |

All the results are the mean of three replicates (*n* = 3); all phenolic glycosides values are expressed as syringol gentiobioside equivalents; *, significantly different to selected control using Dunnett’s mean comparison test (*P*=0.05). †For details of vineyards, see Table 1 ‡Control block selected to compare with. CrRG, cresol rutinoside; GuRG, guaiacol rutinoside; LoQ, limit of quantitation = (1 µg/kg); MSyGG, 4-methylsyringol gentiobioside; MGuRG, 4-methylguaiacol rutinoside; PhRG, phenol rutinoside; SyGG, syringol gentiobioside..

**Table S3**. Basic composition of single-site, varietal wines.

| **Cultivar** | **Vineyard**† | **Alcohol (% abv)** | **RS (g/L)** | **pH** | **TA**‡ **(g/L)** | **MA (g/L)** | **VA (g/L)** |
| --- | --- | --- | --- | --- | --- | --- | --- |
| Chardonnay | A | 14.6 | 5.5 | 3.28 | 8.5 | 3.47 | 0.65 |
|  | B | 14.7 | 1.6 | 3.40 | 7.6 | 2.67 | 0.52 |
|  | C | 13.5 | 1.1 | 3.22 | 9.1 | 3.82 | 0.54 |
|  | D | 13.5 | 1.1 | 3.20 | 10.1 | 4.46 | 0.68 |
|  | E | 13.1 | 1.2 | 3.33 | 7.6 | 3.38 | 0.46 |
|  | G | 13.6 | 0.7 | 3.25 | 8.2 | 3.15 | 0.46 |
|  | J | 14.9 | 2.7 | 3.37 | 8.1 | 3.28 | 0.46 |
|  | K | 13.6 | 1.0 | 3.26 | 8.8 | 3.73 | 0.56 |
|  |  |  |  |  |  |  |  |
| Pinot Noir | A | 12.0 | <0.3 | 3.38 | 6.2 | <0.05 | 0.56 |
|  | B | 11.5 | <0.3 | 3.41 | 6.4 | <0.05 | 0.54 |
|  | C | 11.2 | <0.3 | 3.41 | 6.6 | <0.05 | 0.64 |
|  | D | 13.2 | <0.3 | 3.42 | 6.2 | <0.05 | 0.51 |
|  | E | 13.6 | 0.40 | 3.36 | 6.8 | <0.05 | 0.59 |
|  | G | 11.1 | <0.3 | 3.37 | 5.9 | <0.05 | 0.53 |
|  | L | 11.7 | <0.3 | 3.34 | 6.7 | <0.05 | 0.61 |
|  |  |  |  |  |  |  |  |
| Shiraz | A | 13.9 | 0.30 | 3.59 | 6.4 | <0.05 | 0.51 |
|  | B | 16.3 | 0.40 | 3.69 | 6.3 | 0.24 | 0.38 |
|  | C | 13.9 | <0.3 | 3.64 | 6.5 | 0.06 | 0.52 |
|  | D | 14.0 | 0.40 | 3.60 | 6.5 | 0.05 | 0.52 |
|  | F | 12.2 | 0.40 | 3.60 | 6.1 | 0.05 | 0.41 |
|  | G | 13.2 | <0.3 | 3.60 | 6.8 | <0.05 | 0.48 |
|  | I | 16.5 | 0.30 | 3.56 | 6.5 | 0.06 | 0.31 |
|  | K | 14.4 | 0.40 | 3.51 | 6.7 | 0.05 | 0.50 |

†For details of vineyard code, see Table 1; ‡TA at pH 8.2 (g/L). MA, malic acid; RS, residual sugar expressed as the total of glucose and fructose; VA, volatile acidity as acetic acid.

**Table S4**. Mean sensory ratings for single-site wines made from three cultivars.

| **Cultivar** | **Vineyard**† | **Smoke aroma** | **Overall fruit aroma** | **Overall fruit flavour** |
| --- | --- | --- | --- | --- |
| Chardonnay | A | 0.4 | 4.9 | 5.3 |
|  | B‡ | 1.0 | 5.2 | 5.3 |
|  | C | 1.0 | 5.2 | 4.8 |
|  | D | 1.5 | 4.7 | 4.4 |
|  | E | 1.3 | 4.4 | 4.3 |
|  | G | 1.6 | 4.6 | 4.3 |
|  | J | 2.2 | 4.4 | 4.3 |
|  | K | 2.0 | 5.1 | 4.3 |
| Pinot Noir | A | 0.5 | 3.9 | 4.1 |
|  | B‡ | 1.4 | 4.3 | 3.5 |
|  | C | 5.2* | 2.7* | 2.3 |
|  | D | 2.3 | 4.1 | 4.2 |
|  | E | 3.5* | 3.3 | 2.7 |
|  | G | 7.6* | 1.4* | 1.3* |
|  | L | 6.9* | 1.7* | 1.9* |
| Shiraz | A‡ | 1.6 | 4.4 | 4.4 |
|  | B | 0.5 | 4.9 | 5.5 |
|  | C | 4.7* | 3.4 | 3.6 |
|  | D | 1.0 | 4.5 | 4.5 |
|  | F | 3.6* | 3.4 | 3.3 |
|  | G | 4.9* | 3.4 | 3.1* |
|  | I | 1.8 | 4.5 | 5.0 |
|  | K | 2.8 | 3.8 | 3.9 |

*, significantly different to selected Control using Dunnett’s mean comparison test (*P*=0.05). †For details of vineyard code, see Table 1; ‡Control block selected to compare with.
